# Supplementary material for: Knowledge and Use of Novel Psychoactive Substances in an Italian Sample with Substance Use Disorders
Source: MDPI journal article supplement (doi:10.3390/ijerph19020915), 2022-01-14
Supplement: s1 [file s1]

## SUPPLEMENTARY MATERIAL

### Questionnaire NPS

N \_\_\_\_

Date \_\_\_\_/\_\_\_\_/\_\_\_\_ Place \_\_\_\_\_

1. Age \_\_\_\_\_

2. Sex     M   F

3. Nationality \_\_\_\_\_

4. If you are a foreign national, at what age did you arrive in Italy? \_\_\_\_

5. Place of residence (indicate the province) \_\_\_\_\_

6. Which Ser. D do you belong to? \_\_\_\_\_

7. Highest educational qualification obtained:

- None
- Elementary school degree
- Middle school degree
- High school degree
- Bachelor's degree or Master's degree

8. What is your occupation:

- Employed
- Unemployed
- Looking for occupation
- Housewife
- Student

9. Marital status:

- Unmarried
- Married
- Separated
- Divorced
- Widowed

10. Who do you live with?

- Alone
- With parents
- With a partner
- With friends/housemates

11. What is the age of your first contact with a service for the drug addiction treatment? (e.g., Ser.D, residential program, hospitalization) \_\_\_\_\_

12. Current treatment:

- Outpatient rehab program
- Residential rehab program
- Other

13. Are you currently on a house detention regime, with a suspended sentence or with an alternative sanction?

- Yes
- No

14. Where you diagnosed with a mental disorder **before** starting to use drugs?

- Yes (specify \_\_\_\_\_)
- No

15. Where you diagnosed with a mental disorder **during or after** your addiction?

- Yes (specify \_\_\_\_\_)
- No

16. Where you prescribed any medication to treat your mental disorder(s)?

- Yes (specify \_\_\_\_\_)
- No

17. Did you attempt suicide?

- Yes
- No

18. *Only if you answered Yes to the previous question*, where you hospitalized at the psychiatric services after the suicide attempt?

- Yes (specify the year \_\_\_\_\_)
- No

19. Do you have any severe physical disease that interferes with your life?

- Yes (specify \_\_\_\_\_)
- No

20. *Only if you answered Yes to the previous question*, do you take any medication to treat your physical disease(s)?

- Yes (specify \_\_\_\_\_)
- No

21. Which of the following psychoactive substances did you use in your life? Draw an X in the specified column if you tried the substance AT LEAST ONCE in your life (you can indicate multiple substances), then specify if you consumed the specific substance during the last 30 days and the age of first use.

|                | At least<br>once | Last 30 days | Age of<br>first use |
|----------------|------------------|--------------|---------------------|
| Heroin         | _____            | _____        | _____               |
| Methadone      | _____            | _____        | _____               |
| Cocaine, crack | _____            | _____        | _____               |

|                                                                                        |       |       |       |
|----------------------------------------------------------------------------------------|-------|-------|-------|
| Cannabinoids (marijuana, hashish)                                                      | _____ | _____ | _____ |
| MDMA (ecstasy)                                                                         | _____ | _____ | _____ |
| Amphetamine                                                                            | _____ | _____ | _____ |
| Metamphetamine (“shaboo”)                                                              | _____ | _____ | _____ |
| LSD or other psychedelics (GHB, GBL), dissociative substances such as Ketamine and PCP | _____ | _____ | _____ |
| Drugs without a medical prescription (e.g., Methadone, benzodiazepines, morphine)      | _____ | _____ | _____ |

22. Have you ever used any substance while drinking alcohol?

- Yes
- No

23. *Only if you answered Yes to the previous question*, what is the frequency with which you simultaneously consume/consumed drugs and alcohol?

- Everyday
- More than once in a week
- 2-3 times a week
- I have only tried one or two times in my life

24. Do you think that serious consequences for your physical or mental health could result from the consumption of the aforementioned drugs?

- Not at all
- A little
- Moderately
- A lot
- Extremely

25. Have you ever tried the so called “smart drugs”? Draw an X in the specified column if you tried the substance AT LEAST ONCE in your life (you can indicate multiple substances), then specify if you consumed the specific substance during the last 30 days and the age of first use.

|                                                                                                                                                                     | At<br>least<br>once | Last 30<br>days | Age of<br>first<br>use |
|---------------------------------------------------------------------------------------------------------------------------------------------------------------------|---------------------|-----------------|------------------------|
| <b>Synthetic cannabinoids</b> (known as Spice, Black mamba, Pandora’s box, Arancia meccanica, K2, X, Tai high, Hawaiian haze, Mary joy, Devil’s weed)               | _____               | _____           | _____                  |
| <b>Synthetic cathinones</b> derived from Khat, such as Mephedrone, Flakka and methylone (sold as “bath salts” or “plant fertilizers”), MDPV (“Super coke”) and APVP | _____               | _____           | _____                  |
| <b>Synthetic opioids</b> derived from Fentanyl, AH-7921, MT-45, and new benzodiazepines such as Diclazepam and Flubromazepam                                        | _____               | _____           | _____                  |
| <b>Synthetic hallucinogens</b> such as Phenylethylamine, 5-Meo-DALT, 2C-series, NBOMe-series, and dissociative substances such as Methoxetamine (“Mexxy”)           | _____               | _____           | _____                  |

**Substances of natural origin** such as Kratom, Ayahuasca, Khat and *Salvia divinorum*      —      —      —

I have never used these substances, but I know them      —      —      —

I have never used these substances, and I DON'T know them      —      —      —

26. Have you ever used any “smart drug” while drinking alcohol?

- Yes
- No

27. *Only if you answered Yes to the previous question*, what is the frequency with which you simultaneously consume/consumed smart drugs and alcohol?

- Everyday
- More than once a week
- 2-3 times a week
- I have only tried one or two times in my life

28. Do you think that serious consequences for your physical or mental health could result from the consumption of the aforementioned “smart drugs” ?

- Not at all
- A little
- Moderately
- A lot
- Extremely

*ANSWER TO THE FOLLOWING QUESTIONS ONLY IF YOU TRIED THE **SYNTHETIC CANNABINOIDS** (known as Spice, Black mamba, Pandora's box, Arancia meccanica, K2, X, Tai high, Hawaiian haze, Mary joy, Devil's weed) AT LEAST ONCE IN YOUR LIFE.*

29. Can you specify your most frequent mode of administration of the drug?

- Oral (e.g., tablets or pills)
- Nasal (e.g., sniffing)
- Smoked
- Injected
- Rectal

30. Can you specify the frequency of use?

- Everyday
- More than once a week
- 2-3 times a week or during weekends
- Only 1 or 2 times in my life

31. Where did you mostly consumed the drugs?

- Outside (at the park, in the street, at the beach, at the train station, ...)
- At the workplace or at school
- At your home or a friend's home
- At the disco or clubs
- During a party or a rave party

32. Who provided you the drug most often?

- Offered by friends
- Offered by a stranger
- Bought

33. *Only if you bought the drug*, where did you principally buy it?

- Outside (at the park, in the street, at the beach, at the train station, ...)
- At the workplace or at school
- At a friend's home
- At the disco or clubs
- During a party or a rave party
- From a drug dealer
- Smart shop
- Through websites or social networks (online smart shop, online pharmacies, commercial ads, marketplace...)

34. What is the principal motivation that encouraged you to consume these substances?

- To get high
- To have fun with friends
- To relax
- To forget the problems
- To perform better at school or at work
- To perform better at sports or during sex
- Curiosity and novelty
- For the increased effects
- Perception of less legal risks compared to the "traditional substances"
- Perception of less health dangerousness compared to the "traditional substances"

*ANSWER TO THE FOLLOWING QUESTIONS ONLY IF YOU TRIED THE **SYNTHETIC CATHINONES** (derived from Khat, such as Mephedrone, Flakka and methylone (sold as “bath salts” or “plant fertilizers”), MDPV (“Super coke”) and APVP) AT LEAST ONCE IN YOUR LIFE.*

35. Can you specify your most frequent mode of administration of the drug?

- Oral (e.g., tablets or pills)
- Nasal (e.g., sniffing)
- Smoked
- Injected
- Rectal

36. Can you specify the frequency of use?

- Everyday
- More than once a week
- 2-3 times a week or during weekends
- Only 1 or 2 times in my life

37. Where did you mostly consumed the drugs?

- Outside (at the park, in the street, at the beach, at the train station, ...)
- At the workplace or at school
- At your home or a friend's home
- At the disco or clubs
- During a party or a rave party

38. Who provided you the drug most often?

- Offered by friends
- Offered by a stranger
- Bought

39. *Only if you bought the drug*, where did you principally buy it?

- Outside (at the park, in the street, at the beach, at the train station, ...)
- At the workplace or at school
- At a friend's home
- At the disco or clubs
- During a party or a rave party
- From a drug dealer
- Smart shop
- Through websites or social networks (online smart shop, online pharmacies, commercial ads, marketplace...)

40. What is the principal motivation that encouraged you to consume these substances?

- To get high
- To have fun with friends
- To relax
- To forget the problems
- To perform better at school or at work
- To perform better at sports or during sex
- Curiosity and novelty
- For the increased effects
- Perception of less legal risks compared to the “traditional substances”
- Perception of less health dangerousness compared to the “traditional substances”

*ANSWER TO THE FOLLOWING QUESTIONS ONLY IF YOU TRIED THE **SYNTHETIC OPIOIDS** (derived from Fentanyl, AH-7921, MT-45, and new benzodiazepines such as Diclazepam and Flubromazepam) AT LEAST ONCE IN YOUR LIFE.*

41. Can you specify your most frequent mode of administration of the drug?

- Oral (e.g., tablets or pills)
- Nasal (e.g., sniffing)
- Smoked
- Injected
- Rectal

42. Can you specify the frequency of use?

- Everyday
- More than once a week
- 2-3 times a week or during weekends
- Only 1 or 2 times in my life

43. Where did you mostly consumed the drugs?

- Outside (at the park, in the street, at the beach, at the train station, ...)
- At the workplace or at school
- At your home or a friend's home
- At the disco or clubs
- During a party or a rave party

44. Who provided you the drug most often?

- Offered by friends
- Offered by a stranger
- Bought

45. *Only if you bought the drug*, where did you principally buy it?

- Outside (at the park, in the street, at the beach, at the train station, ...)
- At the workplace or at school
- At a friend's home
- At the disco or clubs
- During a party or a rave party
- From a drug dealer
- Smart shop
- Through websites or social networks (online smart shop, online pharmacies, commercial ads, marketplace...)

46. What is the principal motivation that encouraged you to consume these substances?

- To get high
- To have fun with friends
- To relax
- To forget the problems
- To perform better at school or at work
- To perform better at sports or during sex
- Curiosity and novelty
- For the increased effects
- Perception of less legal risks compared to the "traditional substances"
- Perception of less health dangerousness compared to the "traditional substances"

*ANSWER TO THE FOLLOWING QUESTIONS ONLY IF YOU TRIED THE **SYNTHETIC HALLUCINOGENS** (such as Phenylethylamine, 5-Meo-DALT, 2C-series, NBOMe-series, and dissociative substances such as Methoxetamine (“Mexxy”)) AT LEAST ONCE IN YOUR LIFE.*

47. Can you specify your most frequent mode of administration of the drug?

- Oral (e.g., tablets or pills)
- Nasal (e.g., sniffing)
- Smoked
- Injected
- Rectal

48. Can you specify the frequency of use?

- Everyday
- More than once a week
- 2-3 times a week or during weekends
- Only 1 or 2 times in my life

49. Where did you mostly consumed the drugs?

- Outside (at the park, in the street, at the beach, at the train station, ...)
- At the workplace or at school
- At your home or a friend's home
- At the disco or clubs
- During a party or a rave party

50. Who provided you the drug most often?

- Offered by friends
- Offered by a stranger
- Bought

51. *Only if you bought the drug*, where did you principally buy it?

- Outside (at the park, in the street, at the beach, at the train station, ...)
- At the workplace or at school
- At a friend's home
- At the disco or clubs
- During a party or a rave party
- From a drug dealer
- Smart shop
- Through websites or social networks (online smart shop, online pharmacies, commercial ads, marketplace...)

52. What is the principal motivation that encouraged you to consume these substances?

- To get high
- To have fun with friends
- To relax
- To forget the problems
- To perform better at school or at work
- To perform better at sports or during sex
- Curiosity and novelty
- For the increased effects
- Perception of less legal risks compared to the “traditional substances”
- Perception of less health dangerousness compared to the “traditional substances”



*ANSWER TO THE FOLLOWING QUESTIONS ONLY IF YOU TRIED THE **SUBSTANCES OF NATURAL ORIGIN** (such as Kratom, Ayahuasca, Khat and Salvia divinorum) AT LEAST ONCE IN YOUR LIFE.*

53. Can you specify your most frequent mode of administration of the drug?

- Oral (e.g., tablets or pills)
- Nasal (e.g., sniffing)
- Smoked
- Injected
- Rectal

54. Can you specify the frequency of use?

- Everyday
- More than once a week
- 2-3 times a week or during weekends
- Only 1 or 2 times in my life

55. Where did you mostly consumed the drugs?

- Outside (at the park, in the street, at the beach, at the train station, ...)
- At the workplace or at school
- At your home or a friend's home
- At the disco or clubs
- During a party or a rave party

56. Who provided you the drug most often?

- Offered by friends
- Offered by a stranger
- Bought

57. *Only if you bought the drug*, where did you principally buy it?

- Outside (at the park, in the street, at the beach, at the train station, ...)
- At the workplace or at school
- At a friend's home
- At the disco or clubs
- During a party or a rave party
- From a drug dealer
- Smart shop
- Through websites or social networks (online smart shop, online pharmacies, commercial ads, marketplace...)

58. What is the principal motivation that encouraged you to consume these substances?

- To get high
- To have fun with friends
- To relax
- To forget the problems
- To perform better at school or at work
- To perform better at sports or during sex
- Curiosity and novelty
- For the increased effects
- Perception of less legal risks compared to the "traditional substances"
- Perception of less health dangerousness compared to the "traditional substances"

*ANSWER TO THE FOLLOWING QUESTIONS ONLY IF YOU HAVE **NEVER** USED “SMART DRUGS”, BUT YOU KNOW THEM.*

59. How did you get to know these substances?

- Friends or acquaintances
- Traditional mass media (tv, journals, newspapers, radio)
- Social network or smartphone apps
- During a party or a rave party
- Websites or online communities

60. Do you think that the “smart drugs” entail less legal risks compared to the “traditional substances”?

- Yes
- No

61. Do you think that the “smart drugs” are less dangerous for your physical and mental health compared to the “traditional substances”?

- Yes
- No

62. Are you going to try the “smart drugs” at least once?

- Yes
- No

63. *Only if you answered Yes to the previous question, why would you like to try them?*

- To get high
- To have fun with friends
- To relax
- To forget the problems
- To perform better at school or at work
- To perform better at sports or during sex
- Curiosity and novelty
- For the increased effects
- Perception of less legal risks compared to the “traditional substances”
- Perception of less health dangerousness compared to the “traditional substances”
